# Supplementary material for: Sprouty genes regulate activated fibroblasts in mammary epithelial development and breast cancer
Source: PubMed Central journal article supplement (PMC11006910; doi:10.1038/s41419-024-06637-2), 2024-04-10
Supplement: 41419_2024_6637_MOESM1_ESM.pdf [file 41419_2024_6637_MOESM1_ESM.pdf]

Fig. S2G

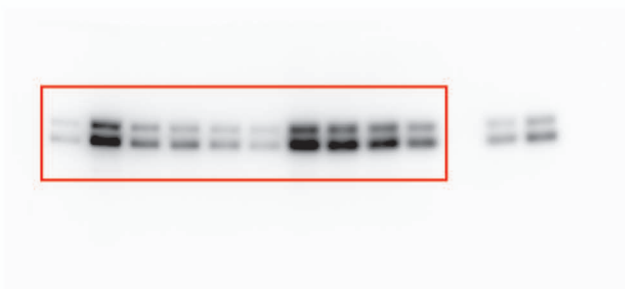

P-ERK1/2

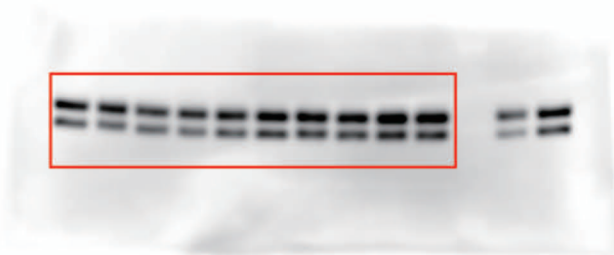

ERK1/2

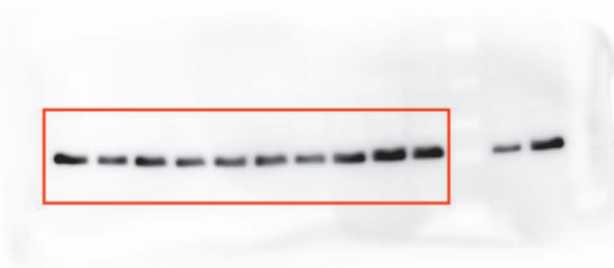

GAPDH
